# Supplementary figures and images for: Neural population dynamics in motor cortex are different for reach and grasp
Source: eLife journal article supplement (doi:10.7554/elife.58848), 2020-11-16

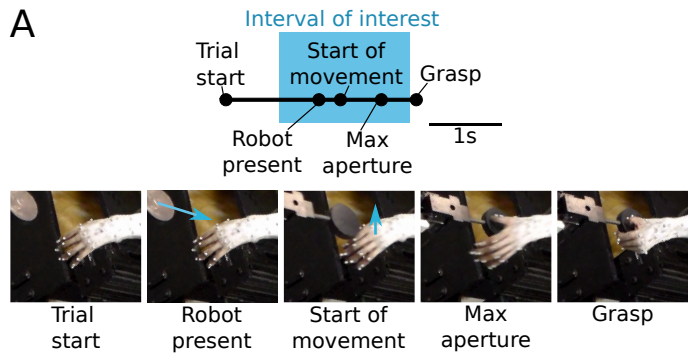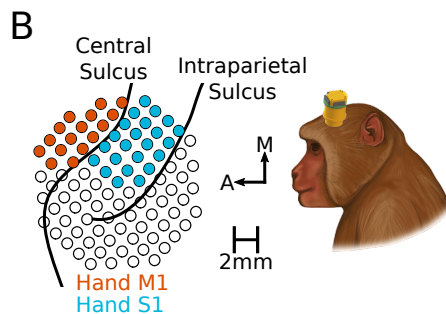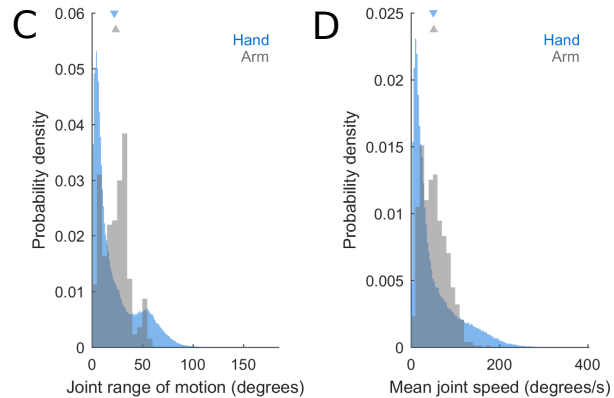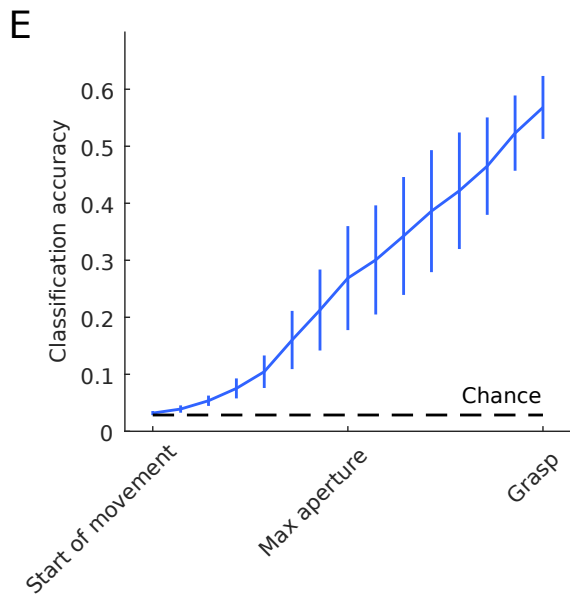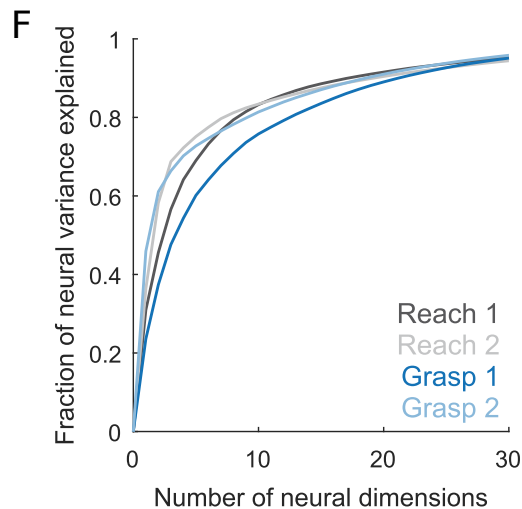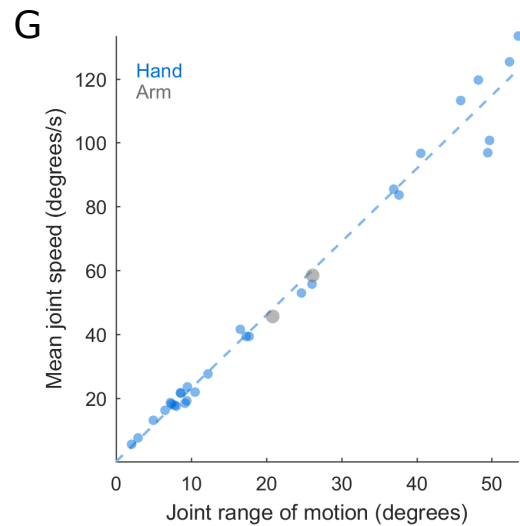

Supplement: supp [file elife_poa_e58848_Figure_1_figure_supplement_1.pdf › elife_poa_e58848_Figure_1_figure_supplement_1.pdf]

**A**

monkey 1

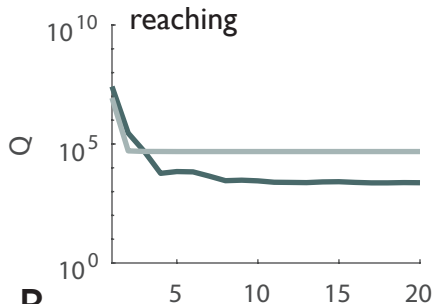

monkey 2

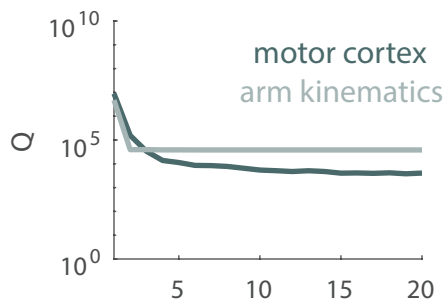**B**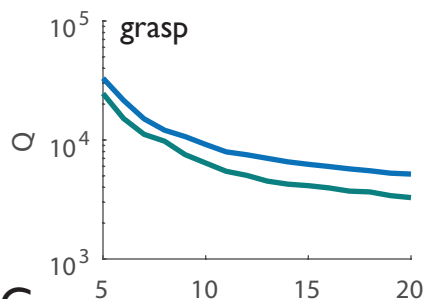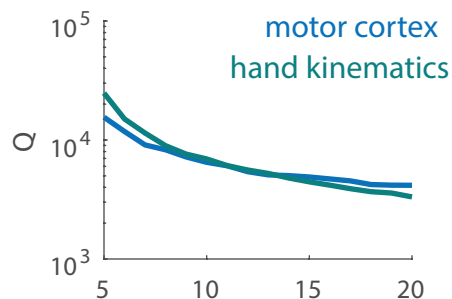**C**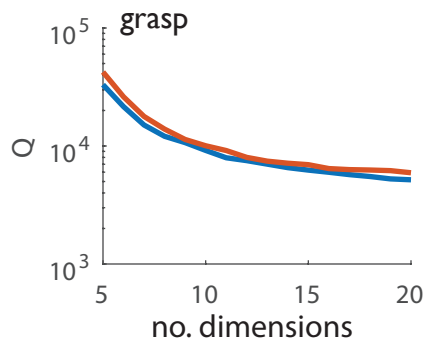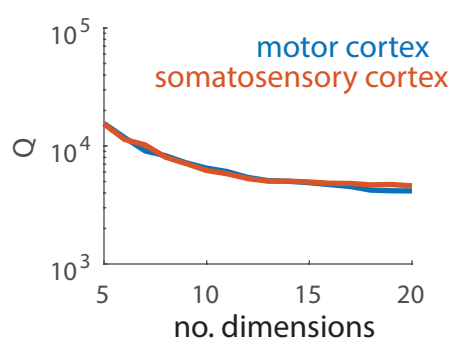

Supplement: supp [file elife_poa_e58848_Figure_3_figure_supplement_1.pdf › elife_poa_e58848_Figure_3_figure_supplement_1.pdf]
